# Supplementary material
Source: MDPI journal article supplement (https://www.mdpi.com/search?q=cells-10-00159)
Supplement: s001 [file cells-10-00159-s001.pdf]

# Immune Cell-Associated Protein Expression Helps to Predict Survival in Muscle-Invasive Urothelial Bladder Cancer Patients after Radical Cystectomy and Optional Adjuvant Chemotherapy

Helge Taubert <sup>1,\*,\dagger</sup>, Markus Eckstein <sup>2,\dagger</sup>, Elena Epple <sup>1,2</sup>, Rudolf Jung <sup>2</sup>, Katrin Weigelt <sup>1</sup>, Verena Lieb <sup>1</sup>, Danijel Sikic <sup>1,\dagger</sup>, Robert Stöhr <sup>2,\dagger</sup>, Carol Geppert <sup>2</sup>, Veronika Weyerer <sup>2</sup>, Simone Bertz <sup>2</sup>, Astrid Kehlen <sup>3</sup>, Arndt Hartmann <sup>2,\dagger</sup>, Bernd Wullich <sup>1,\dagger</sup> and Sven Wach <sup>1,\dagger</sup>

<sup>1</sup> Department of Urology and Pediatric Urology, University Hospital Erlangen, FAU Erlangen-Nürnberg, 91054 Erlangen, Germany; [elena.epple@fau.de](mailto:elena.epple@fau.de) (E.E.); [Katrin.Weigelt@uk-erlangen.de](mailto:Katrin.Weigelt@uk-erlangen.de) (K.W.); [Verena.Lieb@uk-erlangen.de](mailto:Verena.Lieb@uk-erlangen.de) (V.L.); [danijel.sikic@uk-erlangen.de](mailto:danijel.sikic@uk-erlangen.de) (D.S.); [Bernd.Wullich@uk-erlangen.de](mailto:Bernd.Wullich@uk-erlangen.de) (B.W.); [sven.wach@uk-erlangen.de](mailto:sven.wach@uk-erlangen.de) (S.W.)

<sup>2</sup> Institute of Pathology, University Hospital Erlangen, FAU Erlangen-Nürnberg, 91054 Erlangen, Germany; [markus.eckstein@uk-erlangen.de](mailto:markus.eckstein@uk-erlangen.de) (M.E.); [Rudolf.Jung@uk-erlangen.de](mailto:Rudolf.Jung@uk-erlangen.de) (R.J.); [robert.stoehr@uk-erlangen.de](mailto:robert.stoehr@uk-erlangen.de) (R.S.); [carol.geppert@uk-erlangen.de](mailto:carol.geppert@uk-erlangen.de) (C.G.); [veronika.weyerer@uk-erlangen.de](mailto:veronika.weyerer@uk-erlangen.de) (V.W.); [simone.bertz@uk-erlangen.de](mailto:simone.bertz@uk-erlangen.de) (S.B.); [Arndt.Hartmann@uk-erlangen.de](mailto:Arndt.Hartmann@uk-erlangen.de) (A.H.)

<sup>3</sup> Institute of Medical Microbiology, Medical School, Martin-Luther-University Halle-Wittenberg, 06112 Halle (Saale), Germany; [astrid.kehlen@uk-halle.de](mailto:astrid.kehlen@uk-halle.de)

\* Correspondence: [helge.taubert@uk-erlangen.de](mailto:helge.taubert@uk-erlangen.de); Tel.: +49-9131-8542658; Fax: +49-9131-8523374

† Authors contributed equally.

‡ Authors belong to Bridge Consortium, Germany.

**Table S1.** Clinicopathological data and survival parameters of the BCa patients.

| Clinicopathological and Survival Parameters | Patients (Percentage) |
|---------------------------------------------|-----------------------|
| Total                                       | 168                   |
| <b>Morphology</b>                           |                       |
| NOS                                         | 91 (54.1)             |
| Squamous                                    | 37 (22.0)             |
| Sarcomatoid                                 | 9 (5.4)               |
| MPUC                                        | 9 (5.4)               |
| PUC                                         | 6 (3.6)               |
| Pure neuroendocrine                         | 4 (2.4)               |
| Other rare subtypes                         | 12 (7.1)              |
| <b>Gender</b>                               |                       |
| female                                      | 42 (25)               |
| male                                        | 126 (75)              |
| <b>Age (years)</b>                          |                       |
| range                                       | 41.0–90.0             |
| mean                                        | 69.7                  |
| median                                      | 71.0                  |
| <b>Tumor Stage</b>                          |                       |
| pT2                                         | 44 (26.2)             |
| pT3                                         | 85 (50.6)             |
| pT4                                         | 39 (23.2)             |
| <b>Tumor Grade 1973</b>                     |                       |
| G2                                          | 6 (3.6)               |
| G3                                          | 162 (96.4)            |
| <b>Tumor Grade 2004</b>                     |                       |

|                                            |            |
|--------------------------------------------|------------|
| high grade                                 | 168        |
| <b>Nodal Stage</b>                         |            |
| pN0                                        | 104 (61.9) |
| pN1 + 2                                    | 49 (29.2)  |
| pNX                                        | 15 (8.9)   |
| <b>Adjuvant Chemotherapy (Ct)</b>          |            |
| yes                                        | 46 (27.4)  |
| no                                         | 122 (72.6) |
| <b>Survival/observation Time (months)</b>  |            |
| range                                      | 0-135.7    |
| mean                                       | 34.5       |
| median                                     | 23.9       |
| <b>Overall Survival (OS)</b>               |            |
| alive                                      | 46 (27.4)  |
| dead                                       | 122 (72.6) |
| <b>Disease-Specific Survival (DSS)</b>     |            |
| alive                                      | 78 (46.4)  |
| dead                                       | 90 (53.6)  |
| <b>Relapse-Free Survival Time (months)</b> |            |
| range                                      | 0-135.7    |
| mean                                       | 31.0       |
| median                                     | 16.1       |
| <b>Relapse-Free Survival (RFS)</b>         |            |
| without relapse                            | 92 (54.8)  |
| with relapse                               | 76 (45.2)  |
| <b>Stromal TILs</b>                        |            |
| 0                                          | 11 (6.6)   |
| 1-9%                                       | 58 (34.5)  |
| 10-50%                                     | 84 (50.0)  |
| 51-80%                                     | 13 (7.7)   |
| >80%                                       | 2 (1.2)    |
| <b>Molecular Subtypes</b>                  |            |
| Basal                                      | 79 (47.0)  |
| DN                                         | 4 (2.4)    |
| Luminal                                    | 69 (41.1)  |
| Luminal EMT-p53-like                       | 16 (9.5)   |

**Table S2A.** Overview for pT/pN stages and Chemotherapy of the BCa patients

| Parameter | N   | Chemotherapy |     |
|-----------|-----|--------------|-----|
|           |     | yes          | no  |
| <b>pT</b> | 168 | 46           | 122 |
| pT2       | 44  | 5            | 39  |
| pT3       | 85  | 26           | 59  |
| pT4       | 39  | 15           | 24  |
| <b>pN</b> | 168 | 46           | 122 |
| pN0       | 104 | 21           | 83  |
| pN1/2     | 49  | 21           | 28  |
| pNX       | 15  | 4            | 11  |

**Table S2B.** Correlation of pT/pN stages and chemotherapy of the BCa patients

|              |    |                 | pT | pN           | Adj. Chemo   |
|--------------|----|-----------------|----|--------------|--------------|
| Spearman-Rho | pT | correl. coeff.  | 1  | 0.261        | 0.228        |
|              |    | Sig. (2-sided)  |    | <b>0.001</b> | <b>0.003</b> |
|              | pN | correl. coeff.  |    | 1            | 0.150        |
|              |    | Sig. (2-seitig) |    |              | (0.052)      |

Abbreviations: correl. coeff.: correlation coefficient; Adj. Chemo: Adjuvant chemotherapy; Significant p-values are in bold face. P-value with a trend of significance is in parenthesis.

**Table S2C.** Correlation of pT/pN stages and immune markers of the BCa patients

| Spearman Rho |                | pT | pN    | CCL2  | CD68   | CD163   |
|--------------|----------------|----|-------|-------|--------|---------|
| pT           | correl. coeff. | 1  | 0.261 | 0.151 | -0.015 | -0.033  |
|              |                |    | 0.001 | 0.054 | 0.851  | 0.674   |
| pN           | correl. coeff. |    | 1     | 0.097 | -0.130 | -0.104  |
|              |                |    |       | 0.217 | 0.092  | 0.182   |
| CCL2         | correl. coeff. |    |       | 1     | -0.130 | -0.159* |
|              |                |    |       |       | 0.097  | 0.042   |
| CD68         | correl. coeff. |    |       |       | 1      | 0.468   |
|              |                |    |       |       |        | <0.001  |

Abbreviations: correl. coeff.: correlation coefficient; Adj. Chemo: Adjuvant chemotherapy  
Significant p-values are in bold face. P-value with a trend of significance is in parenthesis.

**Table S3.** Kaplan-Meier analysis: Association between chemotherapy and prognosis stratified by nodal stage or tumor stage

|                    | CT + vs. CT- | OS      | DSS     | RFS     | Remarks   |               |
|--------------------|--------------|---------|---------|---------|-----------|---------------|
|                    |              | p-value | p-value | p-value | CT favor. | CT not favor. |
| <b>Nodal stage</b> |              |         |         |         |           |               |
| N0                 |              | n.s.    | (0.078) | 0.032   |           | RFS           |
| N1+2               |              | 0.042   | (0.091) | n.s.    | OS        |               |
| NX                 |              | n.s.    | n.s.    | n.s.    |           |               |
| <b>Tumor stage</b> |              |         |         |         |           |               |
| pT2                |              | n.s.    | 0.010   | 0.005   |           | DSS, RFS      |
| pT3+4              |              | n.s.    | n.s.    | n.s.    |           |               |

Abbreviations: favor.: favorable; not favor.: not favorable; p-values with a trend for significance ( $p > 0.05 < 0.10$ ) are in brackets

**Table S4.** Kaplan-Meier analysis: Association between chemotherapy and prognosis stratified by nodal stage and tumor stage

|           | CT+vs.CT- | OS              | DSS             | RFS             | Remarks   |               |
|-----------|-----------|-----------------|-----------------|-----------------|-----------|---------------|
|           |           | <i>p</i> -value | <i>p</i> -value | <i>p</i> -value | CT favor. | CT not favor. |
| N0/T2     |           | (0.056)         | 0.012           | 0.011           |           | DSS, RFS      |
| N0/T3+4   |           | n.s.            | 0.036           | n.s.            |           |               |
| N1+2/T2   |           | n.s.            | n.s.            | n.s.            |           |               |
| N1+2/T3+4 |           | 0.036           | (0.059)         | n.s.            | OS        |               |

Abbreviations: favor.: favorable; not favor.: not favorable; *p*-values with a trend for significance ( $p > 0.05 < 0.10$ ) are in brackets

**Table S5.** Kaplan-Meier analysis: Association between chemotherapy considering the immune markers CCL2, CD68 and CD163 and prognosis stratified by nodal stage or tumor stage

|                    | CT+ vs. CT- | OS              | DSS             | RFS             | Remarks      |               |
|--------------------|-------------|-----------------|-----------------|-----------------|--------------|---------------|
|                    | Parameter   | <i>p</i> -value | <i>p</i> -value | <i>p</i> -value | CT favor.    | CT not favor. |
| <b>Nodal stage</b> |             |                 |                 |                 |              |               |
| N0                 | CCL2≤6%     | n.s.            | n.s.            | n.s.            |              |               |
| N0                 | CCL2>6%     | n.s.            | n.s.            | 0.044           |              | RFS           |
| N0                 | CD68≤10.4   | n.s.            | n.s.            | n.s.            |              |               |
| N0                 | CD68>10.4   | n.s.            | 0.012           | 0.003           |              | DSS, RFS      |
| N0                 | CD163≤10.34 | n.s.            | n.s.            | n.s.            |              |               |
| N0                 | CD163>10.34 | (0.057)         | 0.004           | 0.006           |              | DSS, RFS      |
| N1+2               | CCL2≤6%     | (0.089)         | 0.031           | 0.035           | DSS, RFS     |               |
| N1+2               | CCL2>6%     | n.s.            | n.s.            | n.s.            |              |               |
| N1+2               | CD68≤10.4   | 0.035           | 0.028           | 0.020           | OS, DSS, RFS |               |
| N1+2               | CD68>10.4   | n.s.            | n.s.            | n.s.            |              |               |
| N1+2               | CD163≤10.34 | 0.020           | (0.062)         | n.s.            | OS           |               |
| N1+2               | CD163>10.34 | n.s.            | n.s.            | n.s.            |              |               |
| <b>Tumor stage</b> |             |                 |                 |                 |              |               |
|                    | Parameter   |                 |                 |                 |              |               |
| pT2                | CCL2≤6%     | n.s.            | n.s.            | n.s.            |              |               |
| pT2                | CCL2>6%     | 0.002           | <0.001          | <0.001          |              | OS,DSS,RFS    |
| pT2                | CD68≤10.4   | n.s.            | n.s.            | n.s.            |              |               |
| pT2                | CD68>10.4   | 0.042           | 0.002           | 0.001           |              | OS, DSS, RFS  |
| pT2                | CD163≤10.34 | n.s.            | n.s.            | n.s.            |              |               |
| pT2                | CD163>10.34 | 0.006           | <0.001          | <0.001          |              | OS, DSS, RFS  |
| pT3+4              | CCL2≤6%     | n.s.            | n.s.            | n.s.            |              |               |
| pT3+4              | CCL2>6%     | n.s.            | n.s.            | 0.026           |              | RFS           |
| pT3+4              | CD68≤10.4   | 0.044           | 0.048           | (0.086)         | OS, DSS      |               |
| pT3+4              | CD68>10.4   | n.s.            | n.s.            | 0.027           |              | RFS           |

|       |                    |         |      |      |
|-------|--------------------|---------|------|------|
| pT3+4 | CD163 $\leq$ 10.34 | (0.072) | n.s. | n.s. |
| pT3+4 | CD163 $>$ 10.34    | n.s.    | n.s. | n.s. |

Abbreviations: favor.: favorable; not favor.: not favorable

Suppl. **Figure S1.** Immunohistochemical staining for CD68 and CD163

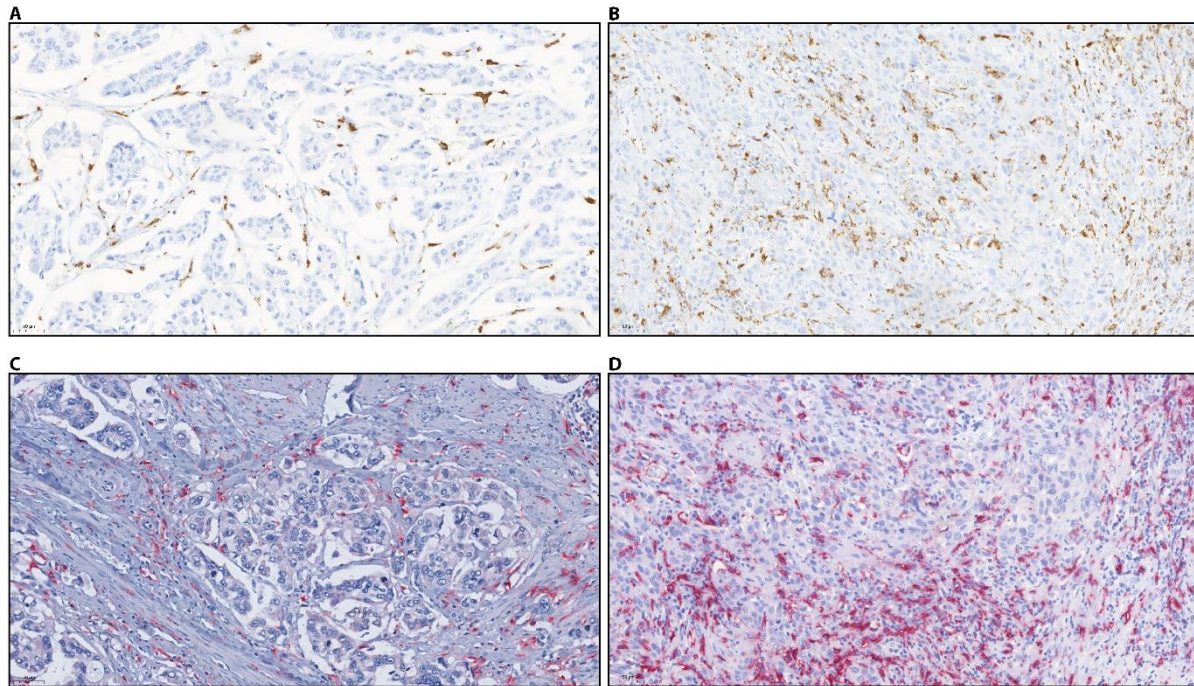

Immunohistochemical staining for CD68 and CD163 in immune cells (macrophages).

Upper row: CD68 staining, (A) low CD68 staining ( $\leq$ 10.4); (B) high CD68 staining ( $>$ 10.4)

Lower row: CD163 staining, (C) low CD163 staining ( $\leq$ 10.34); (D) high CD163 staining ( $>$ 10.34). All photos are at 20 $\times$  magnification.
